# Supplementary material for: Cations brought together by hydrogen bonds: the protonated pyridine–boronic acid dimer explained
Source: Royal Society of Chemistry journal article supplement (doi:10.1039/c8cp07542e), 2019-01-01

Electronic Supplementary Information

**Cations brought together by hydrogen bonds: The protonated pyridine-boronic acid dimer explained**

Íñigo Iribarren, M. Merced Montero-Campillo, Ibon Alkorta, José Elguero, and David Quiñero

Index:

- Pg. S2-S6 Table S1. Intermolecular parameters (Å) of the neutral aromatic boronic acid dimers found in the CSD.
- Pg. S7 Fig. S1. CSD Refcode and structure of the protonated pyridine derivative dimers.
- Pg. S8 Fig. S2. Histogram of the angle between the planes defined by the aromatic ring in all the complexes found in the CSD database for dimers with a double hydrogen bond interaction.
- Pg. S9-S15 Table S2. Molecular graph, Electronic energy and geometry of the optimized complexes at M06-2x/6-311++G(d,p) level in gas phase.
- Pg. 16 Table S3. Intermolecular O...H distances (Å) in the (Ar-BO<sub>2</sub>H<sub>2</sub>)<sub>2</sub> dimers in the different PCM solvent environments.
- Pg. 17 Fig. S3. Electric field maps of the neutral and protonated 2- and 3-pyridine dimers. The region in grey corresponds to the volume of the B(OH)<sub>2</sub> group in one of the molecules. The electric field lines are colored based on the atom of origin (grey for carbon, black for hydrogen, red for oxygen, blue for nitrogen and orange for boron).
- Pg. 18 Fig. S4. Relationships between the electron density properties at the O...H BCP (au) and the interatomic distance (Å) for all the dimers studied in the present article. The values corresponding to the neutral molecules calculated in gas phase are shown with red squares.

Table S1. Intermolecular parameters (Å) of the neutral aromatic boronic acid dimers found in the CSD.

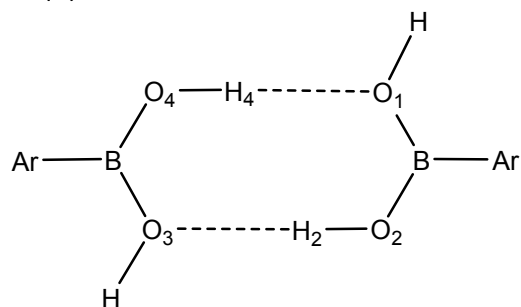

| Refcode  | O1-O4 | O2-O4 | O1-H4 | O3-H2 | Aromatic |
|----------|-------|-------|-------|-------|----------|
| YOQZIO   | 2.465 | 2.465 | 1.647 | 1.647 | Phenyl   |
| LIYHOR   | 2.482 | 2.482 | 1.526 | 1.526 | Phenyl   |
| ROBJID   | 2.543 | 2.507 | 1.704 | 1.659 | Phenyl   |
| ROBJAV   | 2.678 | 2.788 | 1.845 | 1.954 | Phenyl   |
| XUVBAR   | 2.691 | 2.691 | 1.867 | 1.867 | Phenyl   |
| ZUCSIB   | 2.695 | 2.743 | 1.859 | 1.905 | Phenyl   |
| MIDZAB   | 2.697 | 2.697 | 1.915 | 1.915 | Phenyl   |
| QEKSil   | 2.697 | 2.697 | 1.859 | 1.859 | Phenyl   |
| DAPCOP   | 2.702 | 2.702 | 1.879 | 1.879 | Phenyl   |
| USALAC   | 2.704 | 2.704 | 1.908 | 1.908 | Phenyl   |
| RORMES   | 2.706 | 2.842 | 1.892 | 2.024 | Phenyl   |
| WIYNAU   | 2.706 | 2.894 | 1.919 | 2.016 | Phenyl   |
| FEJGIL   | 2.711 | 2.711 | 1.871 | 1.871 | Phenyl   |
| MULQER   | 2.711 | 2.711 | 1.896 | 1.896 | Phenyl   |
| AZASOL   | 2.712 | 2.798 | 1.882 | 1.994 | Phenyl   |
| EJAGAZ   | 2.717 | 2.717 | 1.949 | 1.949 | Phenyl   |
| FAKTER   | 2.717 | 2.756 | 1.883 | 1.919 | Phenyl   |
| OLIDOC   | 2.719 | 2.719 | 1.883 | 1.883 | Phenyl   |
| YIPJIS   | 2.720 | 2.720 | 1.894 | 1.894 | Phenyl   |
| PHBORA01 | 2.721 | 2.734 | 1.804 | 1.888 | Phenyl   |
| FUQBOK   | 2.722 | 2.722 | 1.878 | 1.878 | Phenyl   |
| GODGUC   | 2.722 | 2.722 | 1.898 | 1.898 | Phenyl   |
| PAXSUD   | 2.724 | 2.724 | 1.804 | 1.804 | Phenyl   |
| EHIZOM   | 2.725 | 2.725 | 1.898 | 1.898 | Phenyl   |
| XUVBEV   | 2.725 | 2.725 | 1.910 | 1.910 | Phenyl   |
| QADKIQ   | 2.727 | 2.727 | 1.911 | 1.911 | Phenyl   |
| NIQYUI   | 2.728 | 2.728 | 1.860 | 1.860 | Phenyl   |
| DOVHUT   | 2.729 | 2.759 | 1.912 | 1.940 | Phenyl   |
| FETZUA   | 2.729 | 2.729 | 1.964 | 2.158 | Phenyl   |
| FETZUA   | 2.729 | 2.729 | 2.158 | 1.964 | Phenyl   |
| KUGBUK   | 2.731 | 2.731 | 1.938 | 1.938 | Phenyl   |
| LABMIN   | 2.731 | 2.759 | 1.902 | 1.914 | Phenyl   |
| RUYTEM   | 2.731 | 2.798 | 1.950 | 1.997 | Phenyl   |

|          |       |       |       |       |        |
|----------|-------|-------|-------|-------|--------|
| WAJXEL   | 2.733 | 2.733 | 1.810 | 1.810 | Phenyl |
| BAGYOZ   | 2.734 | 2.734 | 1.849 | 1.849 | Phenyl |
| PHBORA01 | 2.734 | 2.721 | 1.888 | 1.804 | Phenyl |
| PEJZEM   | 2.734 | 2.781 | 1.923 | 1.973 | Phenyl |
| BEWYAE   | 2.735 | 2.735 | 1.896 | 1.896 | Phenyl |
| GESLAT   | 2.735 | 2.735 | 1.927 | 1.927 | Phenyl |
| OHAZOO   | 2.735 | 2.735 | 1.949 | 1.949 | Phenyl |
| PEJZEM   | 2.735 | 2.770 | 1.924 | 1.969 | Phenyl |
| IGERAO   | 2.736 | 2.736 | 1.952 | 1.952 | Phenyl |
| MUWYUZ01 | 2.738 | 2.738 | 1.842 | 1.842 | Phenyl |
| BEWYAE01 | 2.739 | 2.739 | 1.922 | 1.922 | Phenyl |
| ISANOH   | 2.739 | 2.750 | 1.852 | 1.862 | Phenyl |
| TIRXUP   | 2.739 | 2.739 | 1.757 | 1.757 | Phenyl |
| BEWYAE   | 2.740 | 2.740 | 1.904 | 1.904 | Phenyl |
| FUZLES   | 2.740 | 2.740 | 1.919 | 1.919 | Phenyl |
| GISVIO   | 2.740 | 2.740 | 1.881 | 1.881 | Phenyl |
| GODHAJ   | 2.741 | 2.751 | 1.876 | 1.852 | Phenyl |
| ISANOH01 | 2.741 | 2.741 | 1.846 | 1.846 | Phenyl |
| QEKSil   | 2.741 | 2.741 | 1.902 | 1.902 | Phenyl |
| EFIDIH   | 2.742 | 2.742 | 1.909 | 1.909 | Phenyl |
| MUWYUZ   | 2.742 | 2.742 | 1.778 | 1.778 | Phenyl |
| TENRUB   | 2.742 | 2.742 | 1.900 | 1.900 | Phenyl |
| WIYMUN   | 2.742 | 2.742 | 1.921 | 1.921 | Phenyl |
| BEWYAE01 | 2.743 | 2.743 | 1.927 | 1.927 | Phenyl |
| ZILBEB   | 2.743 | 2.743 | 1.913 | 1.913 | Phenyl |
| ZUCSIB   | 2.743 | 2.695 | 1.905 | 1.859 | Phenyl |
| DEWYEK   | 2.744 | 2.744 | 1.926 | 1.926 | Phenyl |
| EJUXAK   | 2.745 | 2.745 | 1.909 | 1.909 | Phenyl |
| WEJCIY   | 2.745 | 2.745 | 1.871 | 1.871 | Phenyl |
| FEJGUX   | 2.746 | 2.746 | 1.906 | 1.906 | Phenyl |
| TIRXUP   | 2.746 | 2.746 | 1.765 | 1.765 | Phenyl |
| VEFCOZ   | 2.746 | 2.746 | 1.823 | 1.823 | Phenyl |
| PEJYUB01 | 2.746 | 2.757 | 1.925 | 1.935 | Phenyl |
| NEBTEV   | 2.748 | 2.748 | 1.928 | 1.928 | Phenyl |
| PHBORA   | 2.748 | 2.758 | 1.965 | 2.058 | Phenyl |
| QACYIE   | 2.748 | 2.748 | 1.909 | 1.909 | Phenyl |
| UJACIT01 | 2.748 | 2.748 | 1.933 | 1.933 | Phenyl |
| PEJYUB   | 2.748 | 2.756 | 1.948 | 1.951 | Phenyl |
| PEJZIQ   | 2.748 | 2.748 | 1.934 | 1.934 | Phenyl |
| DOVJEF   | 2.749 | 2.749 | 1.949 | 1.949 | Phenyl |
| WIYMUN   | 2.749 | 2.749 | 1.934 | 1.934 | Phenyl |
| PEJZAI   | 2.749 | 2.749 | 1.935 | 1.935 | Phenyl |
| TASCEW   | 2.750 | 2.750 | 1.905 | 1.905 | Phenyl |

|          |       |       |       |       |        |
|----------|-------|-------|-------|-------|--------|
| TECCEL   | 2.750 | 2.750 | 1.921 | 1.921 | Phenyl |
| VOSZOU   | 2.750 | 2.839 | 1.919 | 1.998 | Phenyl |
| WIYMOH01 | 2.750 | 2.750 | 1.962 | 1.962 | Phenyl |
| UJACUF   | 2.752 | 2.840 | 1.877 | 1.962 | Phenyl |
| BPHBAC01 | 2.753 | 2.753 | 2.085 | 2.085 | Phenyl |
| WIYPEA   | 2.753 | 2.753 | 1.923 | 1.923 | Phenyl |
| BASQOD   | 2.754 | 2.754 | 1.866 | 1.866 | Phenyl |
| GODHAJ   | 2.754 | 2.754 | 1.836 | 1.836 | Phenyl |
| DOVJOP   | 2.755 | 2.755 | 1.943 | 1.943 | Phenyl |
| KEZDOK   | 2.755 | 2.757 | 1.942 | 1.941 | Phenyl |
| ROGMEF   | 2.755 | 2.755 | 1.939 | 1.939 | Phenyl |
| RORMES   | 2.755 | 2.755 | 1.938 | 1.938 | Phenyl |
| VIVQAT   | 2.755 | 2.755 | 1.926 | 1.926 | Phenyl |
| ZUCREW   | 2.756 | 2.756 | 1.894 | 1.894 | Phenyl |
| PEJYUB   | 2.756 | 2.748 | 1.951 | 1.948 | Phenyl |
| PHBORA02 | 2.756 | 2.746 | 1.937 | 1.928 | Phenyl |
| GESLAT   | 2.757 | 2.757 | 1.938 | 1.938 | Phenyl |
| ROGKUU   | 2.757 | 2.757 | 1.960 | 1.960 | Phenyl |
| XOSFAN   | 2.757 | 2.757 | 1.868 | 1.868 | Phenyl |
| TUNNEW   | 2.758 | 2.758 | 1.922 | 1.922 | Phenyl |
| VEFCIT   | 2.758 | 2.758 | 1.805 | 1.805 | Phenyl |
| ETOLAA   | 2.759 | 2.759 | 1.869 | 1.869 | Phenyl |
| QEKSil   | 2.759 | 2.751 | 1.922 | 1.919 | Phenyl |
| FAKTER   | 2.760 | 2.763 | 1.922 | 1.925 | Phenyl |
| RORNIX   | 2.760 | 2.760 | 2.006 | 2.006 | Phenyl |
| RORPOF   | 2.760 | 2.760 | 1.915 | 1.915 | Phenyl |
| BASQET   | 2.761 | 2.761 | 1.849 | 1.849 | Phenyl |
| IYAXAH   | 2.761 | 2.761 | 1.930 | 1.930 | Phenyl |
| YICHIB01 | 2.761 | 2.761 | 1.947 | 1.947 | Phenyl |
| ZAPDAV   | 2.761 | 2.761 | 1.885 | 1.885 | Phenyl |
| GISVIO   | 2.762 | 2.762 | 1.878 | 1.878 | Phenyl |
| NUPZAB   | 2.762 | 2.762 | 1.900 | 1.900 | Phenyl |
| EFIDON   | 2.763 | 2.763 | 1.925 | 1.925 | Phenyl |
| HUXXII   | 2.763 | 2.763 | 1.884 | 1.884 | Phenyl |
| KUGBOE   | 2.763 | 2.763 | 1.965 | 1.965 | Phenyl |
| RORMUI   | 2.763 | 2.763 | 1.932 | 1.932 | Phenyl |
| DECROT   | 2.764 | 2.764 | 1.929 | 1.929 | Phenyl |
| KOJQAC   | 2.764 | 2.764 | 1.931 | 1.931 | Phenyl |
| RORPUL   | 2.764 | 2.764 | 2.002 | 2.002 | Phenyl |
| FOVMOT   | 2.765 | 2.765 | 1.890 | 1.890 | Phenyl |
| KEZDOK   | 2.765 | 2.765 | 1.947 | 1.947 | Phenyl |
| VIVPUM   | 2.765 | 2.765 | 1.872 | 1.872 | Phenyl |
| XOSDOZ   | 2.765 | 2.765 | 1.890 | 1.890 | Phenyl |

|          |       |       |       |       |        |
|----------|-------|-------|-------|-------|--------|
| DOVHON   | 2.766 | 2.766 | 1.965 | 1.965 | Phenyl |
| VOSZUA   | 2.768 | 2.768 | 2.024 | 2.024 | Phenyl |
| WIYMOH   | 2.768 | 2.768 | 1.961 | 1.961 | Phenyl |
| ZUCRIA   | 2.768 | 2.768 | 1.941 | 1.941 | Phenyl |
| NEYVIX   | 2.769 | 2.769 | 1.891 | 1.891 | Phenyl |
| PELMIF   | 2.771 | 2.771 | 1.898 | 1.898 | Phenyl |
| BASQIX   | 2.772 | 2.772 | 1.852 | 1.852 | Phenyl |
| XOSDUF   | 2.772 | 2.804 | 1.864 | 1.894 | Phenyl |
| AZATAY   | 2.773 | 2.773 | 1.873 | 1.873 | Phenyl |
| GETPAY   | 2.773 | 2.773 | 1.941 | 1.941 | Phenyl |
| IRASIF   | 2.773 | 2.773 | 1.831 | 1.831 | Phenyl |
| DEWYAG   | 2.774 | 2.774 | 1.916 | 1.916 | Phenyl |
| WIYMUN01 | 2.774 | 2.774 | 1.962 | 1.962 | Phenyl |
| XOSDUF   | 2.774 | 2.774 | 1.898 | 1.898 | Phenyl |
| EBIXIZ   | 2.775 | 2.775 | 1.938 | 1.938 | Phenyl |
| TENROV   | 2.775 | 2.813 | 1.932 | 1.984 | Phenyl |
| GITLAX   | 2.778 | 2.778 | 1.871 | 1.871 | Phenyl |
| RORMES   | 2.778 | 2.778 | 1.962 | 1.962 | Phenyl |
| PEJZOW   | 2.779 | 2.779 | 1.963 | 1.963 | Phenyl |
| UJADAM   | 2.780 | 2.780 | 1.896 | 1.896 | Phenyl |
| UJADEQ   | 2.781 | 2.781 | 1.923 | 1.923 | Phenyl |
| ROBJAV   | 2.782 | 2.724 | 1.947 | 1.891 | Phenyl |
| LABCUM   | 2.783 | 2.783 | 1.956 | 1.956 | Phenyl |
| WIYMUN01 | 2.783 | 2.783 | 1.968 | 1.968 | Phenyl |
| TUNGAK01 | 2.786 | 2.786 | 1.975 | 1.975 | Phenyl |
| RORQAS   | 2.787 | 2.787 | 1.977 | 1.977 | Phenyl |
| GESKEW   | 2.788 | 2.788 | 1.896 | 1.896 | Phenyl |
| HOXPIU01 | 2.789 | 2.789 | 1.709 | 1.709 | Phenyl |
| BUDREY   | 2.789 | 2.789 | 1.937 | 1.937 | Phenyl |
| TITDEG   | 2.790 | 2.790 | 1.897 | 1.897 | Phenyl |
| MOKKON01 | 2.792 | 2.792 | 1.989 | 1.989 | Phenyl |
| DOVJIJ   | 2.793 | 2.793 | 1.968 | 1.968 | Phenyl |
| HOXPIU   | 2.794 | 2.794 | 1.907 | 1.907 | Phenyl |
| OCEFAF   | 2.794 | 2.794 | 1.956 | 1.956 | Phenyl |
| SAFSID   | 2.795 | 2.795 | 1.985 | 1.985 | Phenyl |
| AZASIF   | 2.796 | 2.796 | 1.937 | 1.937 | Phenyl |
| WENZUL   | 2.796 | 2.796 | 2.061 | 2.061 | Phenyl |
| JESXIR   | 2.796 | 2.796 | 1.984 | 1.984 | Phenyl |
| MUCJUQ   | 2.797 | 2.797 | 1.969 | 1.969 | Phenyl |
| RUYTEM   | 2.798 | 2.731 | 1.997 | 1.950 | Phenyl |
| TUNGAK   | 2.798 | 2.798 | 1.975 | 1.975 | Phenyl |
| DOVJOP01 | 2.799 | 2.799 | 2.028 | 2.028 | Phenyl |
| GETPEC   | 2.799 | 2.799 | 2.047 | 2.047 | Phenyl |

|          |       |       |       |       |             |
|----------|-------|-------|-------|-------|-------------|
| OLEXAF   | 2.799 | 2.799 | 2.052 | 2.052 | Phenyl      |
| VOSZOU   | 2.799 | 2.732 | 1.988 | 1.896 | Phenyl      |
| REHDOY   | 2.800 | 2.800 | 1.964 | 1.964 | Phenyl      |
| YUTQEL   | 2.800 | 2.800 | 1.964 | 1.964 | Phenyl      |
| UCETUS   | 2.803 | 2.803 | 1.855 | 1.855 | Phenyl      |
| REHDOY   | 2.804 | 2.804 | 1.970 | 1.970 | Phenyl      |
| CIQHAN   | 2.805 | 2.805 | 1.967 | 1.967 | Phenyl      |
| NEBTAR   | 2.806 | 2.806 | 1.982 | 1.982 | Phenyl      |
| UZUMEI   | 2.806 | 2.806 | 1.928 | 1.928 | Phenyl      |
| RORNOD   | 2.808 | 2.808 | 2.040 | 2.040 | Phenyl      |
| MOKKON   | 2.809 | 2.809 | 1.972 | 1.972 | Phenyl      |
| TILLUX   | 2.809 | 2.809 | 2.000 | 2.000 | Phenyl      |
| RONLIP   | 2.817 | 2.817 | 1.931 | 1.931 | Phenyl      |
| OLEXOT   | 2.824 | 2.824 | 1.998 | 1.998 | Phenyl      |
| ZUCROG   | 2.824 | 2.824 | 2.017 | 2.017 | Phenyl      |
| TAZBEE   | 2.831 | 2.831 | 1.927 | 1.927 | Phenyl      |
| OCAJUY   | 2.834 | 2.834 | 1.971 | 1.971 | Phenyl      |
| KERQOP   | 2.836 | 2.836 | 2.054 | 2.054 | Phenyl      |
| RORMES   | 2.842 | 2.706 | 2.024 | 1.892 | Phenyl      |
| MELGES   | 2.845 | 2.845 | 2.045 | 2.045 | Phenyl      |
| XECHUJ   | 2.846 | 2.846 | 2.000 | 2.000 | Phenyl      |
| MELGES   | 2.851 | 2.851 | 2.049 | 2.049 | Phenyl      |
| MELGIW   | 2.865 | 2.865 | 2.084 | 2.084 | Phenyl      |
| KEGNAM   | 2.875 | 2.875 | 2.046 | 2.046 | Phenyl      |
| MELGAO   | 2.901 | 2.901 | 2.090 | 2.090 | Phenyl      |
| VUWHAY   | 2.960 | 2.960 | 2.209 | 2.209 | Phenyl      |
| QUSPUQ   | 2.748 | 2.779 | 1.982 | 2.010 | 4-Pyridyl   |
| BAJTEM   | 2.790 | 2.790 | 2.076 | 2.076 | 3-Pyridyl   |
| BAJTEM01 | 2.766 | 2.766 | 2.050 | 2.050 | 3-Pyridyl   |
| BAJTEM02 | 2.780 | 2.780 | 1.965 | 1.965 | 3-Pyridyl   |
| BAJTIQ   | 2.761 | 2.761 | 1.962 | 1.962 | 3-Pyridyl   |
| DIXTIO   | 2.769 | 2.787 | 1.985 | 1.950 | 3-Pyridyl   |
| DIXTOU   | 2.710 | 2.710 | 1.875 | 1.875 | 3-Pyridyl   |
| FECSEM   | 2.780 | 2.780 | 1.910 | 1.910 | 3-Pyridyl   |
| FECSEM   | 2.749 | 2.749 | 1.939 | 1.939 | 3-Pyridyl   |
| FUBKOD   | 2.775 | 2.775 | 1.956 | 1.956 | 3-Pyridyl   |
| QUSQAX   | 2.697 | 2.748 | 1.887 | 2.045 | 3-Pyridyl   |
| SARQOU   | 2.740 | 2.740 | 1.917 | 1.916 | 5-Pyrimidyl |
| ZOQVEI   | 2.762 | 2.762 | 1.914 | 1.914 | 5-Pyrimidyl |

Fig. S1. CSD Refcode and structure of the protonated pyridine derivative dimers.

| Refcode | Structure                                                                            |
|---------|--------------------------------------------------------------------------------------|
| DUKJOK  | 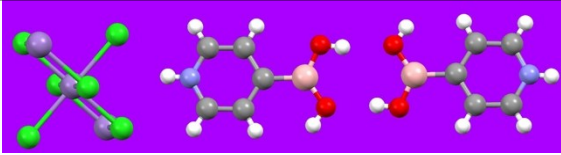   |
| DUKJUQ  |    |
| DUKKAX  |    |
| DUKKEB  |   |
| DUKKIF  |  |

Fig. S2. Histogram of the angle between the planes defined by the aromatic ring in all the complexes found in the CSD database for dimers with a double hydrogen bond interaction.

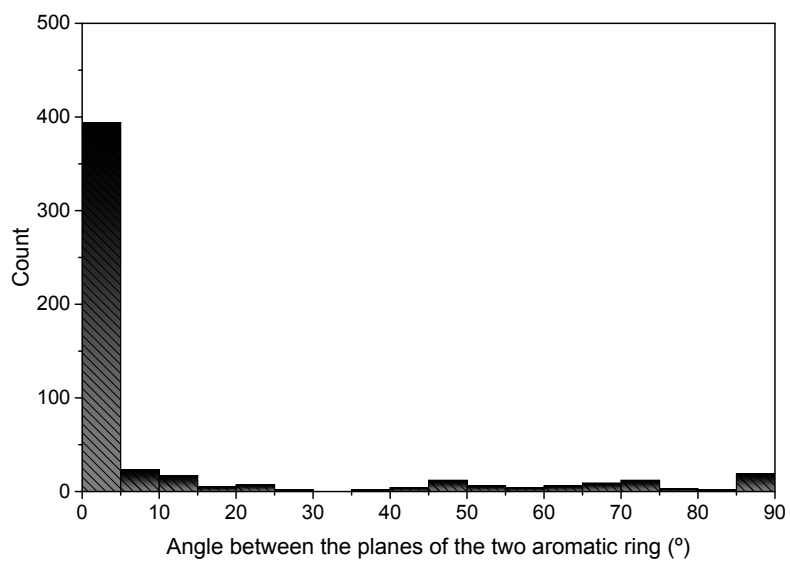



Table S2. Molecular graph (small green and red spheres indicate the position of the bond and ring critical points, respectively), Electronic energy and geometry of the optimized  $(R-B(OH)_2)_2$  and  $[(RH-B(OH)_2)_2]^{2+}$  dimers in gas phase (R can be Ph = phenyl, Py = pyridine, Py(H+) = protonated pyridine) at M06-2x/6-311++G(d,p) level.

|  |                                                                                                                                                                                                                                                                                                                                                                                                                                                                                                                                                                                                                                                                                                                                                                                                                                                                                                                                                                                                                                                                                                                                                                                                                                                                                                                                                                                                                                                                                                                                                                                                                                                                                                                                                                                                                                                                                                                                                                                             |
|--|---------------------------------------------------------------------------------------------------------------------------------------------------------------------------------------------------------------------------------------------------------------------------------------------------------------------------------------------------------------------------------------------------------------------------------------------------------------------------------------------------------------------------------------------------------------------------------------------------------------------------------------------------------------------------------------------------------------------------------------------------------------------------------------------------------------------------------------------------------------------------------------------------------------------------------------------------------------------------------------------------------------------------------------------------------------------------------------------------------------------------------------------------------------------------------------------------------------------------------------------------------------------------------------------------------------------------------------------------------------------------------------------------------------------------------------------------------------------------------------------------------------------------------------------------------------------------------------------------------------------------------------------------------------------------------------------------------------------------------------------------------------------------------------------------------------------------------------------------------------------------------------------------------------------------------------------------------------------------------------------|
|  | <p>dBO2H2.ph<br/>           Electronic Energy= -816.467470025 Hartree, NIMAG= 0<br/>           B,2.0980536358,0.0752072307,0.1060262542<br/>           B,-2.0980536358,-0.0752072307,0.1060262542<br/>           O,1.4759146694,1.2684759823,0.0304160906<br/>           O,-1.3213761271,1.0635039865,0.2641590068<br/>           O,1.3213761271,-1.0635039865,0.2641590068<br/>           O,-1.4759146694,-1.2684759823,0.0304160906<br/>           H,0.5086791413,1.2195525487,0.1123331954<br/>           H,-1.8274335513,1.873463097,0.3569956097<br/>           C,5.762509303,-1.2052152546,-0.1174937051<br/>           H,-0.5086791413,-1.2195525487,0.1123331954<br/>           C,4.373538632,-1.1904107994,-0.0506514819<br/>           C,3.6614288414,0.0117200842,0.0216972382<br/>           C,4.3892961417,1.2078945527,0.0178410973<br/>           C,5.7775672895,1.2032038043,-0.0456942903<br/>           C,6.4658370888,-0.0049649406,-0.1129213307<br/>           H,6.2947373208,-2.1472862265,-0.175684149<br/>           H,3.8520496255,-2.1444477099,-0.0675261164<br/>           H,3.8484918377,2.1464135131,0.0666934842<br/>           H,6.3247035122,2.1386784046,-0.0445777031<br/>           H,7.5484833821,-0.0116270002,-0.1638162256<br/>           H,1.8274335513,-1.873463097,0.3569956097<br/>           C,-3.6614288414,-0.0117200842,0.0216972382<br/>           C,-4.3892961417,-1.2078945527,0.0178410973<br/>           C,-4.373538632,1.1904107994,-0.0506514819<br/>           C,-5.7775672895,-1.2032038043,-0.0456942903<br/>           H,-3.8484918377,-2.1464135131,0.0666934842<br/>           C,-5.762509303,1.2052152546,-0.1174937051<br/>           H,-3.8520496255,2.1444477099,-0.0675261164<br/>           C,-6.4658370888,0.0049649406,-0.1129213307<br/>           H,-6.3247035122,-2.1386784046,-0.0445777031<br/>           H,-6.2947373208,2.1472862265,-0.175684149<br/>           H,-7.5484833821,0.0116270002,-0.1638162256</p> |
|--|---------------------------------------------------------------------------------------------------------------------------------------------------------------------------------------------------------------------------------------------------------------------------------------------------------------------------------------------------------------------------------------------------------------------------------------------------------------------------------------------------------------------------------------------------------------------------------------------------------------------------------------------------------------------------------------------------------------------------------------------------------------------------------------------------------------------------------------------------------------------------------------------------------------------------------------------------------------------------------------------------------------------------------------------------------------------------------------------------------------------------------------------------------------------------------------------------------------------------------------------------------------------------------------------------------------------------------------------------------------------------------------------------------------------------------------------------------------------------------------------------------------------------------------------------------------------------------------------------------------------------------------------------------------------------------------------------------------------------------------------------------------------------------------------------------------------------------------------------------------------------------------------------------------------------------------------------------------------------------------------|

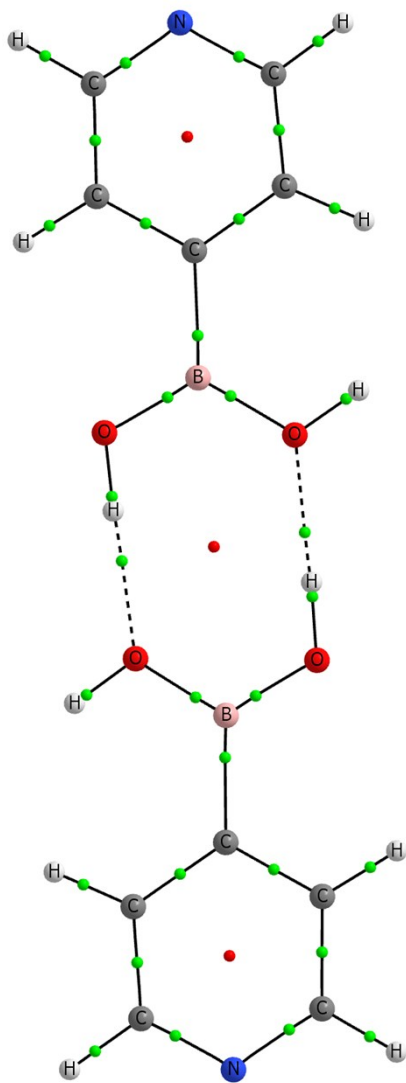

dBO2H2.4py

Electronic Energy= -848.544311163 Hartree, NIMAG= 0

B,-2.09017602,0.06354937,0.1099263  
 B,2.09017602,-0.06354937,0.1099263  
 O,-1.4784309,1.25925028,0.04097425  
 O,1.32041641,1.07500638,0.2754528  
 O,-1.32041641,-1.07500638,0.2754528  
 O,1.4784309,-1.25925028,0.04097425  
 H,-0.51097231,1.22296209,0.12763057  
 H,1.82478777,1.88835142,0.34978068  
 H,-1.82478777,-1.88835142,0.34978068  
 H,0.51097231,-1.22296209,0.12763057  
 C,-5.77224516,-1.14633969,-0.14228626  
 C,-4.38422741,-1.18981209,-0.05570451  
 C,-3.65801123,0.00058498,0.00587469  
 C,-4.39499504,1.1859497,-0.02886309  
 C,-5.78168712,1.1279413,-0.11345819  
 N,-6.47006606,-0.01265908,-0.16936517  
 H,-6.34931084,-2.06458275,-0.19318911  
 H,-3.90018969,-2.1623551,-0.04746904  
 H,-3.8864091,2.14190346,0.01066501  
 H,-6.37012048,2.03990591,-0.13847477  
 C,3.65801123,-0.00058498,0.00587469  
 C,4.39499504,-1.1859497,-0.02886309  
 C,4.38422741,1.18981209,-0.05570451  
 C,5.78168712,-1.1279413,-0.11345819  
 H,3.8864091,-2.14190346,0.01066501  
 C,5.77224516,1.14633969,-0.14228626  
 H,3.90018969,2.1623551,-0.04746904  
 N,6.47006606,0.01265908,-0.16936517  
 H,6.37012048,-2.03990591,-0.13847477  
 H,6.34931084,2.06458275,-0.19318911

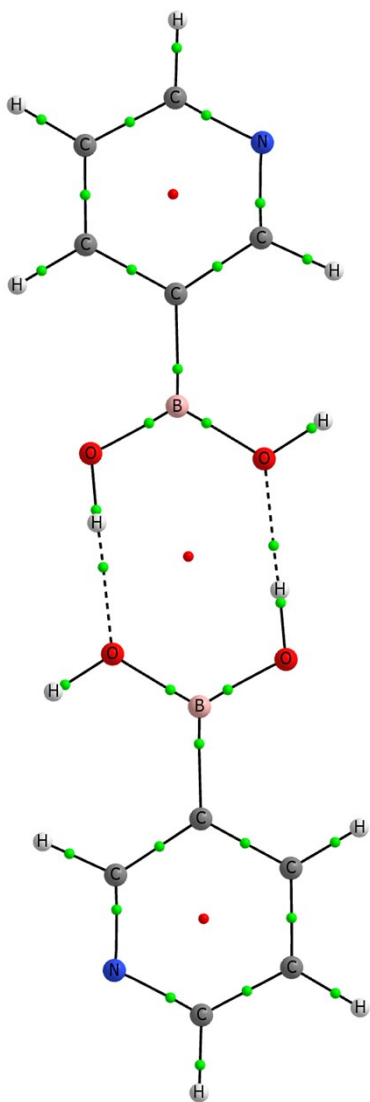

dBO2H2.3py

Electronic Energy= -848.548098990 Hartree, NIMAG= 2

B,-2.1000356016,-0.0605619392,0.  
 B,2.1000356016,0.0605619392,0.  
 O,-1.4876547555,-1.2599012225,0.  
 O,1.3207844431,-1.0850406044,0.  
 O,-1.3207844431,1.0850406044,0.  
 O,1.4876547555,1.2599012225,0.  
 H,-0.5165093827,-1.2178178703,0.  
 H,1.8170521634,-1.9065504562,0.  
 H,-1.8170521634,1.9065504562,0.  
 H,0.5165093827,1.2178178703,0.  
 N,5.732399223,-1.2502839604,0.  
 C,4.4029526781,-1.1755002208,0.  
 C,3.665920564,0.0114374501,0.  
 C,4.400512896,1.2014975824,0.  
 C,5.7859877479,1.1507075819,0.  
 C,6.4017486829,-0.0981725059,0.  
 H,7.4846812843,-0.1772970814,0.  
 H,3.9019117767,-2.1433083976,0.  
 H,3.8746624251,2.1500032545,0.  
 H,6.3852623276,2.0525582937,0.  
 C,-3.665920564,-0.0114374501,0.  
 C,-4.400512896,-1.2014975824,0.  
 C,-4.4029526781,1.1755002208,0.  
 C,-5.7859877479,-1.1507075819,0.  
 H,-3.8746624251,-2.1500032545,0.  
 N,-5.732399223,1.2502839604,0.  
 H,-3.9019117767,2.1433083976,0.  
 C,-6.4017486829,0.0981725059,0.  
 H,-6.3852623276,-2.0525582937,0.  
 H,-7.4846812843,0.1772970814,0.

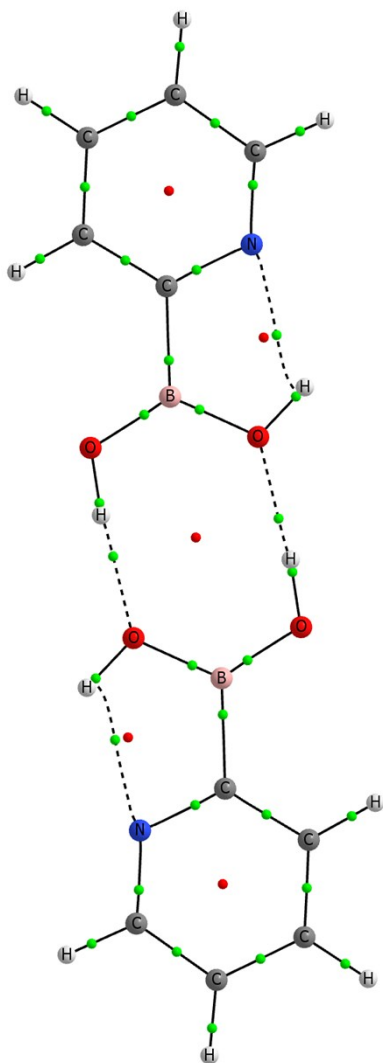

dBO2H2.2py

Electronic Energy= -848.561785168 Hartree, NIMAG= 0

B,-1.76996142,-1.01918094,0.

B,1.76993878,1.01915582,0.

O,-0.70455331,-1.8372771,0.

O,1.64928246,-0.35104843,0.

O,-1.64930222,0.35102067,0.

O,0.70451085,1.83723012,0.

H,0.15288839,-1.37441377,0.

H,2.53938611,-0.73667664,0.

C,-5.4748477,-1.05679738,0.

H,-0.1529026,1.37430215,0.

N,-4.2061182,-0.65853138,0.

C,-3.2385993,-1.5960546,0.

C,-3.5293555,-2.95930027,0.

C,-4.85763313,-3.36758764,0.

C,-5.85155154,-2.3977898,0.

H,-6.22695045,-0.27392777,0.

H,-5.11492898,-4.42049878,0.

H,-6.90063912,-2.6659866,0.

H,-2.53939396,0.73666771,0.

C,3.23857624,1.59602637,0.

C,3.52934923,2.95926807,0.

N,4.20608338,0.65849111,0.

C,4.85763169,3.36753776,0.

C,5.47481731,1.05673992,0.

C,5.85153772,2.39772714,0.

H,5.11494088,4.42044563,0.

H,6.22690775,0.273859,0.

H,6.90062828,2.66591224,0.

H,-2.71396704,-3.67275873,0.

H,2.71397162,3.67273922,0.

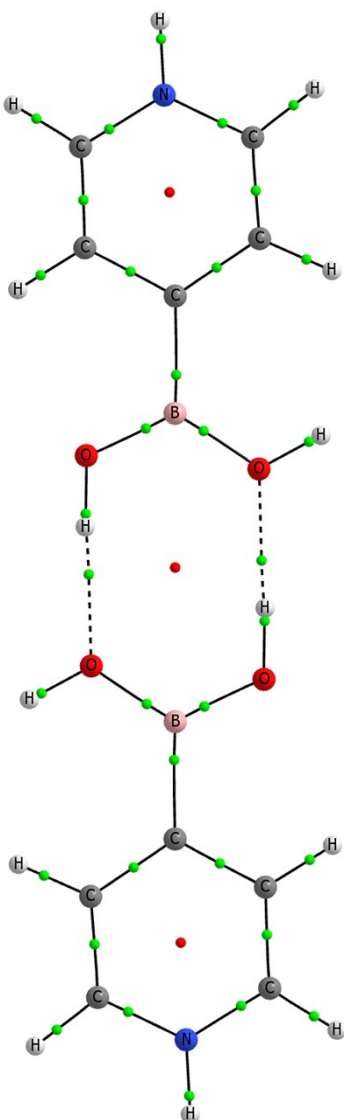

dBO2H2.4py+

Electronic Energy= -849.219551097 Hartree, NIMAG= 0

B,-2.0989072634,0.0299569703,-0.0378856698  
 B,2.0989072634,-0.0299569703,-0.0378856698  
 O,-1.5416501759,-1.1850826642,-0.0190149699  
 O,1.3241657178,-1.1592698888,-0.0874965234  
 O,-1.3241657178,1.1592698888,-0.0874965234  
 O,1.5416501759,1.1850826642,-0.0190149699  
 H,-0.5705911069,-1.2140047737,-0.0462970185  
 H,1.7673954035,-2.0086845205,-0.1580988435  
 H,-1.7673954035,2.0086845205,-0.1580988435  
 H,0.5705911069,1.2140047737,-0.0462970185  
 C,-5.8400618438,1.141019815,0.2009274785  
 C,-4.4618813776,1.2140437498,0.1766731494  
 C,-3.6975440194,0.0563373007,-0.0020266604  
 C,-4.3723536933,-1.1628839093,-0.1457380845  
 C,-5.7503990132,-1.2004091627,-0.1208643612  
 N,-6.4353532246,-0.054271034,0.0496966889  
 H,-6.4888181499,1.9962480459,0.3373327024  
 H,-4.011733637,2.1902042198,0.31059658  
 H,-3.8159876334,-2.0826425121,-0.2751057928  
 H,-6.3340612708,-2.105258746,-0.2289508668  
 H,-7.4519129635,-0.0949343985,0.0681831221  
 C,3.6975440194,-0.0563373007,-0.0020266604  
 C,4.3723536933,1.1628839093,-0.1457380845  
 C,4.4618813776,-1.2140437498,0.1766731494  
 C,5.7503990132,1.2004091627,-0.1208643612  
 H,3.8159876334,2.0826425121,-0.2751057928  
 C,5.8400618438,-1.141019815,0.2009274785  
 H,4.011733637,-2.1902042198,0.31059658  
 N,6.4353532246,0.054271034,0.0496966889  
 H,6.3340612708,2.105258746,-0.2289508668  
 H,6.4888181499,-1.9962480459,0.3373327024  
 H,7.4519129635,0.0949343985,0.0681831221

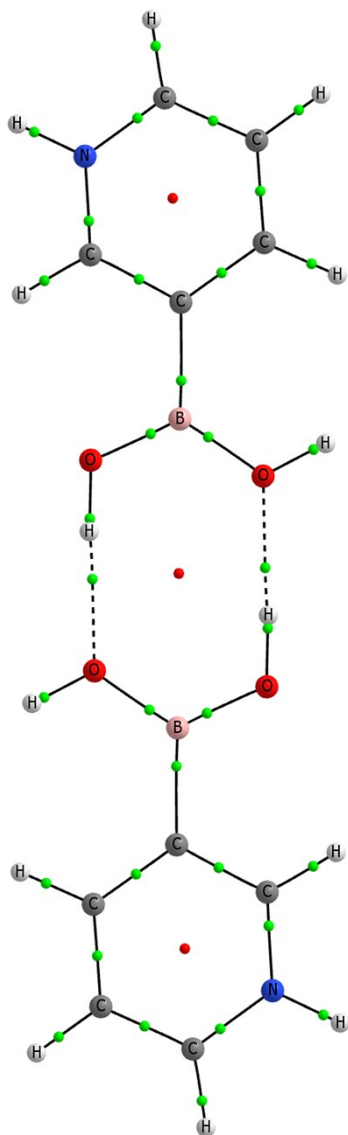

dBO2H2.3py+,

Electronic Energy= -849.224315364 Hartree, NIMAG= 0

B,-2.10185825,-0.05556675,0.

B,2.10185825,0.05556675,0.

O,-1.55848342,1.16939411,0.

O,1.30863459,1.17293694,0.

O,-1.30863459,-1.17293694,0.

O,1.55848342,-1.16939411,0.

H,-0.58742312,1.20857305,0.

H,1.73861265,2.03201883,0.

H,-1.73861265,-2.03201883,0.

H,0.58742312,-1.20857305,0.

C,-5.87849271,-1.17416482,0.

C,-4.4863671,-1.24984006,0.

C,-3.69145923,-0.09963129,0.

C,-4.35399266,1.11978205,0.

N,-5.69648288,1.16686863,0.

C,-6.47508019,0.06715186,0.

H,-6.49617816,-2.06214743,0.

H,-4.03172985,-2.23553861,0.

H,-3.82824911,2.06694369,0.

H,-6.14911786,2.07811347,0.

H,-7.54576263,0.22463131,0.

C,3.69145923,0.09963129,0.

C,4.35399266,-1.11978205,0.

C,4.4863671,1.24984006,0.

N,5.69648288,-1.16686863,0.

H,3.82824911,-2.06694369,0.

C,5.87849271,1.17416482,0.

H,4.03172985,2.23553861,0.

C,6.47508019,-0.06715186,0.

H,6.14911786,-2.07811347,0.

H,6.49617816,2.06214743,0.

H,7.54576263,-0.22463131,0.

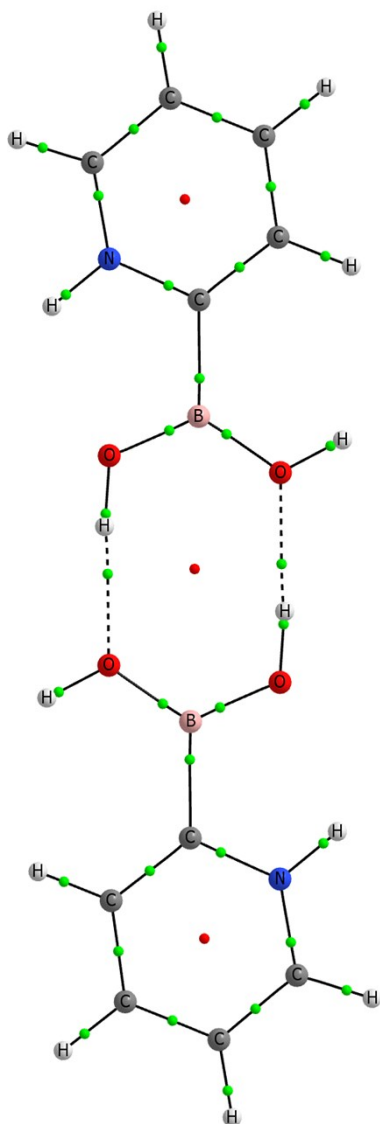

dBO2H2.2py+

Electronic Energy= -849.229475519 Hartree, NIMAG= 0

B,-2.0854064467,-0.1147048455,0.

B,2.0854064467,0.1147048455,0.

O,-1.5860427727,1.1300240883,0.

O,1.2817161757,1.2163299634,0.

O,-1.2817161757,-1.2163299634,0.

O,1.5860427727,-1.1300240883,0.

H,-0.6178817062,1.2211734584,0.

H,1.7027512773,2.081223422,0.

C,-5.8903861985,-1.1197291393,0.

H,0.6178817062,-1.2211734584,0.

C,-4.5020135965,-1.2746836378,0.

C,-3.6777710513,-0.1642740691,0.

N,-4.2755644458,1.0531599329,0.

C,-5.6000643975,1.2477438871,0.

C,-6.4465939405,0.1527458632,0.

H,-6.5331976103,-1.9922886278,0.

H,-4.0754223229,-2.2701053521,0.

H,-3.6506130919,1.8608734655,0.

H,-5.9462656699,2.2733283544,0.

H,-7.5176217987,0.3052811039,0.

H,-1.7027512773,-2.081223422,0.

C,3.6777710513,0.1642740691,0.

N,4.2755644458,-1.0531599329,0.

C,4.5020135965,1.2746836378,0.

C,5.6000643975,-1.2477438871,0.

H,3.6506130919,-1.8608734655,0.

C,5.8903861985,1.1197291393,0.

H,4.0754223229,2.2701053521,0.

C,6.4465939405,-0.1527458632,0.

H,5.9462656699,-2.2733283544,0.

H,6.5331976103,1.9922886278,0.

H,7.5176217987,-0.3052811039,0.

Table S3. Intermolecular O...H distances (Å) in the (R-B(OH)<sub>2</sub>)<sub>2</sub> and [(RH-B(OH)<sub>2</sub>)<sub>2</sub>]<sup>2+</sup> dimers in gas phase (R can be Ph = phenyl, Py = pyridine, Py(H<sup>+</sup>) = protonated pyridine) in the different PCM solvent environments.

| Ar                    | gas   | N-hexane | CHCl <sub>3</sub> | Acetone | Water |
|-----------------------|-------|----------|-------------------|---------|-------|
| Ph                    | 1.843 | 1.839    | 1.834             | 1.831   | 1.830 |
| 4-Py                  | 1.843 | 1.838    | 1.834             | 1.834   | 1.831 |
| 3-Py                  | 1.842 | 1.838    | 1.834             | 1.831   | 1.829 |
| 2-Py                  | 1.813 | 1.811    | 1.806             | 1.805   | 1.803 |
| 4-Py(H <sup>+</sup> ) | 1.896 | 1.870    | 1.843             | 1.831   | 1.830 |
| 3-Py(H <sup>+</sup> ) | 1.896 | 1.860    | 1.842             | 1.834   | 1.829 |
| 2-Py(H <sup>+</sup> ) | 1.900 | 1.862    | 1.840             | 1.827   | 1.822 |



Fig. S3. Electric field maps of the neutral and protonated 2- and 3-pyridine dimers. The region in grey corresponds to the volume of the  $B(OH)_2$  group in one of the molecules. The electric field lines are colored based on the atom of origin (grey for carbon, black for hydrogen, red for oxygen, blue for nitrogen and orange for boron).

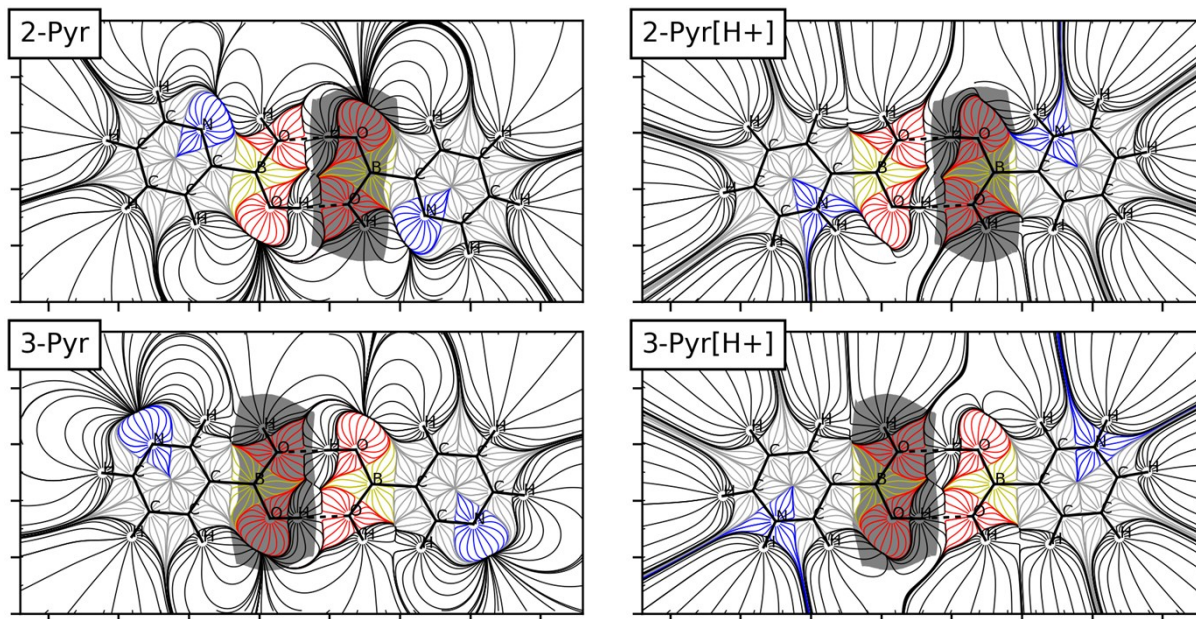

Fig. S4. Relationships between the electron density properties at the O...H BCP (au) and the interatomic distance (Å) for all the dimers studied in the present article. The values corresponding to the neutral molecules calculated in gas phase are shown with red squares.

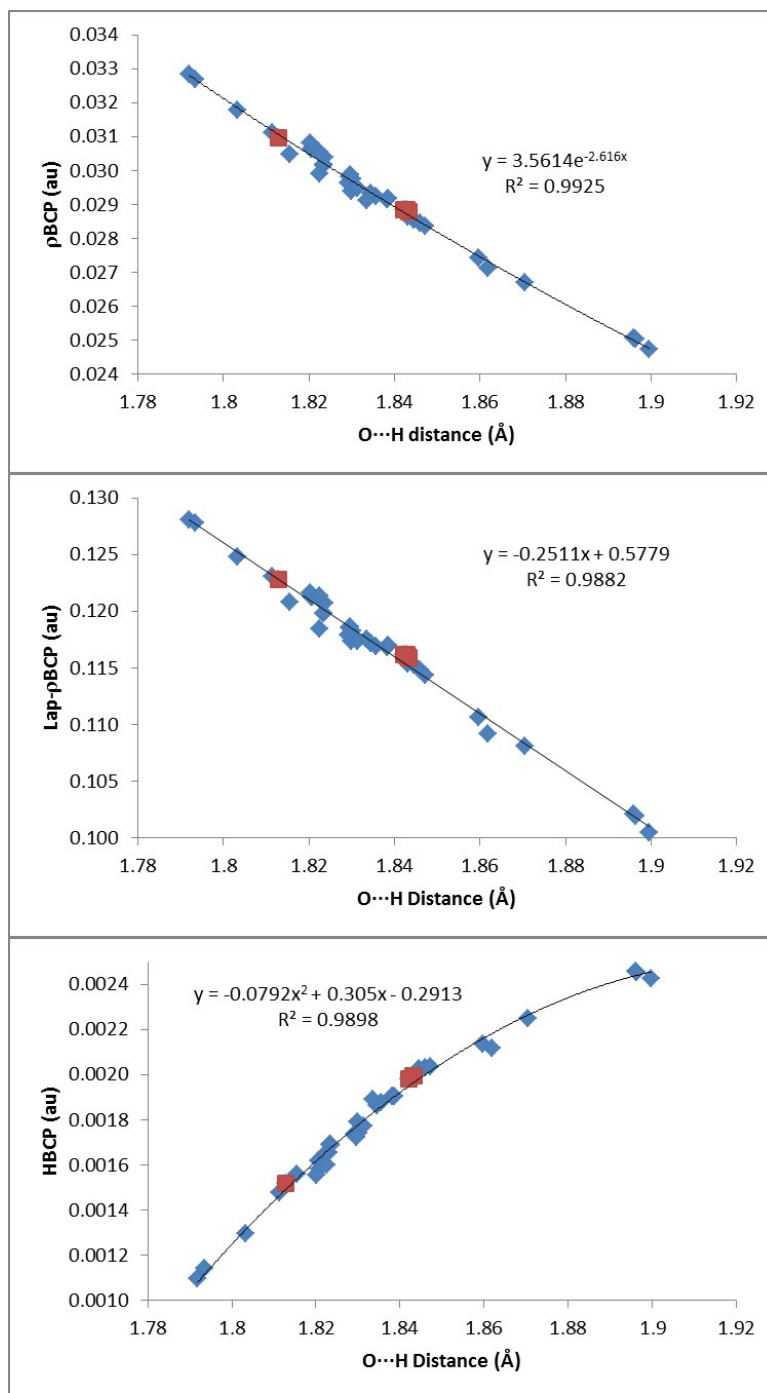

Supplement: c8cp07542e1.pdf [file c8cp07542e1.pdf]
